# Supplementary material
Source: publisher figshare collection journal article supplement (https://acs.figshare.com/ndownloader/files/5105086)
Supplement: Supplementary file 1 [file 5105086]

## Supporting Information:

Erwin Reisner, Vladimir B. Arion,\* Anna Eichinger, Norbert Kandler, Gerald Giester, Armando J. L. Pombeiro,\* and Bernhard K. Keppler\*

### Tuning of Redox Properties for the Design of Ruthenium Anticancer Drugs: Part 2. Syntheses, Crystal Structures and Electrochemistry of Potentially Antitumor $[\text{Ru}^{\text{III/II}}\text{Cl}_{6-n}(\text{azole})_n]^z$ ( $n = 3,4,6$ ) Complexes

S1–S2: Geometrical Details of complexes **B** and **C** studied by X-ray diffraction methods

S3–S7: Selected Bond Distances and Angles for **B** and **C**

S8: UV-vis Absorption Bands for **B** and **C** in Methanol at 298K

S9–S10: Figures showing ORTEP views of **B1b**, **B7b**, packing details of **B7**, **C2**, **C3** and **C6**

S11: UV-vis Absorption Bands against  $E_{1/2}$  ( $\text{Ru}^{\text{III}}/\text{Ru}^{\text{II}}$ ) for **B** and **C**.

S12: The Electronic Absorption Spectra of **C2** and **C6** in 0.2 M phosphate buffer at pH 7.0.

**Crystal structures.** Complex **B1**. The dihedral angles of mutually *trans* butylimidazole ligands are –30.6 and –9.9° in **B1a** and **B1b**, correspondingly. The butylimidazol ligands coordinated to ruthenium via N10 and N19 in **B1a** are tilted relative to the mean plane through Ru1N10N19Cl11Cl13, the corresponding angles being at 36.7 and 6.3°. In **B1b** the dihedral angles between imidazole rings bonded to ruthenium via N37 and N46, and the mean plane through Ru2N37N46Cl4Cl6 are at 45.2 and 35.6°, respectively. The imidazole rings ligated to ruthenium via N1 and N28 nearly bisect the angles Cl3Ru1N10 and Cl6Ru2N46, the torsion angles  $\Theta_{\text{C2N1Ru1Cl3}}$  and  $\Theta_{\text{C29N28Ru2Cl6}}$  being at –38.60(15) and 33.90(15)°, correspondingly.

Complex **B4**. The bond angles at the ruthenium center have almost idealized values; the largest deviations from 90 and 180° were found for Cl3–Ru–Cl2 at 92.67(3)° and N4–Ru–N10 at 176.94(7)°. The triazole ligands coordinated *via* N4 and N10 are tilted relative to the mean plane through RuN4N10Cl11Cl13, the corresponding angles being at 48.7 and 14.5°, while the triazole ligand ligated *via* N16 nearly bisects the angle Cl1–Ru–N4, the torsion angle  $\Theta_{\text{Cl1RuN16Cl15}}$  being at 37.87(19)°.

Complex **B5**. The 4-methylpyrazole ligands linked to the Ru atom *via* N1 and N7 are nearly coplanar to the mean planes through RuCl11Cl2Cl3N1 and RuCl2N1N7N13, correspondingly. The torsion angles

$\Theta_{\text{N1RuN7C11}}$  and  $\Theta_{\text{Cl3RuN1N2}}$  are at  $-4.25(18)$  and  $2.31(15)^\circ$ , respectively. The thirdazole ring ligated to Ru atom *via* N13 is tilted to the RuCl2N7N1N13 mean plane by  $\sim 26^\circ$ .

Complex **B6**·H<sub>2</sub>O. The triazole ligand ligated *via* N2 bisects the angle Cl1–Ru–N3, the torsion angle  $\Theta_{\text{Cl1RuN2C3}}$  being at  $-45.44(15)^\circ$ . The other two torsion angles  $\Theta_{\text{Cl3RuN7N6}}$  and  $\Theta_{\text{Cl3RuN12C13}}$  indicating the position of triazole ligands coordinated *via* N7 and N12 are at  $48.38(12)$  and  $-48.52(15)^\circ$ , respectively.

Complex **B7**. The pyrazole ligands *trans* to each other are almost coplanar in both cases, the corresponding dihedral angle being at  $1.7$  (**B7a**) and  $3.8^\circ$  (**B7b**). Their position in respect to the Ru1N6N11Cl1Cl3 and Ru2N21N26Cl4Cl6 can be defined by torsion angles  $\Theta_{\text{N12N11Ru1Cl3}}$  at  $-29.1(2)$  and  $\Theta_{\text{N7N6Ru1Cl3}}$  at  $30.14(18)^\circ$  in molecule **B7a** and  $\Theta_{\text{Cl6Ru2N21C25}}$  at  $156.2(2)$  and  $\Theta_{\text{Cl6Ru2N26C30}}$  at  $-154.6(2)^\circ$  in **B7b**. The positions of the pyrazole rings bonded to ruthenium through N1 and N16 in respect to Ru1Cl1Cl2Cl3N1 and Ru2Cl4Cl5Cl6N16 are defined by the torsion angles  $\Theta_{\text{N2N1Ru1Cl3}}$  at  $-18.63(18)^\circ$  and  $\Theta_{\text{N17N16Ru2Cl6}}$  at  $40.75(18)^\circ$ .

Complex **C2**. The orientation of the imidazole rings with respect to the Ru–Cl1 vector is almost staggered, the  $\Theta_{\text{C3N1RuCl1}}$  and  $\Theta_{\text{C6N3RuCl1}}$  torsion angles being at  $45.63(11)$  and  $50.48(11)^\circ$ .

Complex **C3**·CH<sub>3</sub>OH·(C<sub>2</sub>H<sub>5</sub>)<sub>2</sub>O. The orientation of benzimidazole ligands in respect to Ru–Cl1 and Ru–Cl2 vectors is very similar, tending to minimize steric crowding between them and is determined by torsion angles  $\Theta_{\text{C1N1RuCl1}}$  at  $-41.35(13)$ ,  $\Theta_{\text{C8N3RuCl1}}$  at  $-44.66(12)$ ,  $\Theta_{\text{C21N5RuCl2}}$  at  $-45.79(14)$  and  $\Theta_{\text{C28N7RuCl2}}$  at  $-45.41(14)^\circ$ .

Complex **C6a**·2H<sub>2</sub>O. The orientation of the Htrz planes with respect to the Ru–Cl vector is almost staggered, the  $\Theta_{\text{C3N2RuCl}}$  and  $\Theta_{\text{N6N7RuCl}}$  torsion angles being at  $31.8(3)$  and  $30.3(3)^\circ$ , respectively.

Complex **C7**. The *trans*-coordinated pyrazole ligands are parallel to each other. The dihedral angle between them is small and does not exceed  $1^\circ$ . The N–N bonds in *trans*-coordinated ligands are also *trans* to each other. The orientation of pyrazole ligands in respect to Ru–Cl1 and Ru–Cl2 vectors is described by the torsion angles  $\Theta_{\text{C5N1Ru1Cl1}}$  at  $-17.61(16)$ ,  $\Theta_{\text{N7N6Ru1Cl1}}$  at  $24.20(13)$ ,  $\Theta_{\text{N12N11Ru2Cl2}}$  at  $-33.33(14)$  and  $\Theta_{\text{N17–N16–Ru2–Cl2}}$  at  $21.67(14)^\circ$ . Both the coordinated chloro ligands and the chloride counter anions are involved in hydrogen bonding interactions.

**Table S1.** Selected Bond Distances (Å) and Angles (°) in Two Independent Molecules of **B1**

| Atom1–Atom2       | <b>B1a</b>  | Atom1–Atom2       | <b>B1b</b>  |
|-------------------|-------------|-------------------|-------------|
| Ru1–N1            | 2.0623(15)  | Ru2–N28           | 2.0670(15)  |
| Ru1–N10           | 2.0768(14)  | Ru2–N37           | 2.0763(15)  |
| Ru1–N19           | 2.0886(14)  | Ru2–N46           | 2.0744(15)  |
| Ru1–Cl1           | 2.3602(6)   | Ru2–Cl4           | 2.3597(6)   |
| Ru1–Cl2           | 2.3696(6)   | Ru2–Cl5           | 2.3800(6)   |
| Ru1–Cl3           | 2.3603(6)   | Ru2–Cl6           | 2.3522(6)   |
| Atom1-Atom2-Atom3 |             | Atom1-Atom2-Atom3 |             |
| N10–Ru1–N19       | 176.88(6)   | N37–Ru2–N46       | 178.02(6)   |
| N1–Ru1–Cl2        | 178.55(4)   | N28–Ru2–Cl5       | 177.94(4)   |
| Cl1–Ru1–Cl3       | 178.343(15) | Cl4–Ru2–Cl6       | 178.389(16) |

**Table S2.** Selected Interatomic Bond Distances (Å) and Angles (°) in **B4**

| Atom1–Atom2       | Å          | Atom1–Atom2       | Å         |
|-------------------|------------|-------------------|-----------|
| Ru1–N4            | 2.0691(18) | Ru1–Cl1           | 2.3627(7) |
| Ru1–N10           | 2.0864(18) | Ru1–Cl2           | 2.3541(8) |
| Ru1–N16           | 2.0748(19) | Ru1–Cl3           | 2.3395(6) |
| Atom1-Atom2-Atom3 | deg        | Atom1-Atom2-Atom3 | deg       |
| N4–Ru1–N10        | 176.94(7)  | N16–Ru1–Cl2       | 177.30(5) |
| Cl1–Ru1–Cl3       | 177.37(2)  |                   |           |

**Table S3.** Selected Bond Distances (Å) and Angles (°) in **B5**

| Atom1–Atom2       | Å           | Atom1–Atom2       | Å         |
|-------------------|-------------|-------------------|-----------|
| Ru1–N1            | 2.0793(17)  | Ru1–Cl1           | 2.3468(6) |
| Ru1–N7            | 2.0576(16)  | Ru1–Cl2           | 2.3912(6) |
| Ru1–N13           | 2.0504(16)  | Ru1–Cl3           | 2.3413(6) |
| Atom1-Atom2-Atom3 | deg         | Atom1-Atom2-Atom3 | deg       |
| N7–Ru1–N13        | 178.50(7)   | N1–Ru1–Cl2        | 178.66(5) |
| Cl1–Ru1–Cl3       | 178.654(19) |                   |           |

**Table S4.** Selected Bond Distances (Å) and Angles (°) in **B6·H<sub>2</sub>O**

| Atom1–Atom2       | Å           | Atom1–Atom2       | Å         |
|-------------------|-------------|-------------------|-----------|
| Ru1–N2            | 2.0764(15)  | Ru1–Cl1           | 2.3434(7) |
| Ru1–N7            | 2.0734(16)  | Ru1–Cl2           | 2.3469(6) |
| Ru1–N12           | 2.0667(16)  | Ru1–Cl3           | 2.3427(8) |
| Atom1-Atom2-Atom3 | deg         | Atom1-Atom2-Atom3 | deg       |
| N7–Ru1–N12        | 178.66(6)   | N2–Ru1–Cl2        | 179.51(4) |
| Cl1–Ru1–Cl3       | 178.539(16) |                   |           |

**Table S5.** Selected Bond Distances (Å) and Angles (°) in Two Independent Molecules in **B7**

| Atom1–Atom2       | <b>B7a</b> | Atom1–Atom2       | <b>B7b</b> |
|-------------------|------------|-------------------|------------|
| Ru1–N1            | 2.073(2)   | Ru2–N16           | 2.0630(19) |
| Ru1–N6            | 2.0527(19) | Ru2–N21           | 2.0665(19) |
| Ru1–N11           | 2.0600(19) | Ru2–N26           | 2.0641(19) |
| Ru1–Cl1           | 2.3584(8)  | Ru2–Cl4           | 2.3536(8)  |
| Ru1–Cl2           | 2.3552(9)  | Ru2–Cl5           | 2.3539(8)  |
| Ru1–Cl3           | 2.3777(8)  | Ru2–Cl6           | 2.3820(8)  |
| Atom1-Atom2-Atom3 |            | Atom1-Atom2-Atom3 |            |
| N6–Ru1–N11        | 177.54(8)  | N21–Ru2–N26       | 179.28(7)  |
| N1–Ru1–Cl2        | 178.37(5)  | N16–Ru2–Cl5       | 179.06(5)  |
| Cl1–Ru1–Cl3       | 179.41(2)  | Cl4–Ru2–Cl6       | 177.61(2)  |

**Table S6.** Selected Bond Distances (Å) and Angles (°) in **C2**

| Atom1–Atom2           | Å          | Atom1–Atom2           | Å          |
|-----------------------|------------|-----------------------|------------|
| Ru1–N1                | 2.0687(12) | Ru1–N3                | 2.0682(12) |
| Ru1–Cl1               | 2.3379(6)  | Ru1–Cl2               | 2.3458(6)  |
| Atom1-Atom2-Atom3 deg |            | Atom1-Atom2-Atom3 deg |            |
| N3–Ru1–N1             | 90.19(5)   | N3–Ru1–Cl1            | 90.43(3)   |
| N1–Ru1–Cl1            | 90.34(3)   | N3–Ru1–Cl2            | 89.57(3)   |
| N1–Ru1–Cl2            | 89.66(3)   | Cl1–Ru1–Cl2           | 180.0      |

**Table S7.** Selected Bond Distances (Å) and Angles (°) in **C3**·CH<sub>3</sub>OH·(C<sub>2</sub>H<sub>5</sub>)<sub>2</sub>O

| Atom1–Atom2       | Å           | Atom1–Atom2       | Å          |
|-------------------|-------------|-------------------|------------|
| Ru1–N1            | 2.0862(15)  | Ru1–N7            | 2.0792(14) |
| Ru1–N3            | 2.0697(14)  | Ru1–Cl1           | 2.3570(8)  |
| Ru1–N5            | 2.0732(15)  | Ru1–Cl2           | 2.3232(8)  |
| Atom1-Atom2-Atom3 | deg         | Atom1-Atom2-Atom3 | deg        |
| N1–Ru1–N5         | 177.14(5)   | N3–Ru1–N7         | 178.09(5)  |
| Cl1–Ru1–Cl2       | 178.601(15) |                   |            |

**Table S8.** Selected Bond Distances (Å) and Angles (°) in **C6**·2H<sub>2</sub>O

| Atom1–Atom2       | Å          | Atom1–Atom2       | Å        |
|-------------------|------------|-------------------|----------|
| Ru1–N2            | 2.073(3)   | Ru1–N7            | 2.074(3) |
| Ru1–Cl1           | 2.3289(10) |                   |          |
| Atom1-Atom2-Atom3 | deg        | Atom1-Atom2-Atom3 | deg      |
| N2–Ru1–N7         | 86.84(12)  | N2–Ru1–Cl1        | 89.58(9) |
| N7–Ru1–Cl1        | 91.07(9)   |                   |          |

**Table S9.** Selected Bond Distances (Å) and Angles (°) in **C7**

| Atom1–Atom2       | Å          | Atom1–Atom2       | Å          |
|-------------------|------------|-------------------|------------|
| Ru1–N1            | 2.0557(15) | Ru2–N11           | 2.0624(15) |
| Ru1–N6            | 2.0571(15) | Ru2–N16           | 2.0659(18) |
| Ru1–Cl1           | 2.3767(9)  | Ru2–Cl2           | 2.3565(7)  |
| Atom1-Atom2-Atom3 | deg        | Atom1-Atom2-Atom3 | deg        |
| N1–Ru1–N6         | 89.14(6)   | N11–Ru2–N16       | 93.03(6)   |
| N1–Ru1–Cl1        | 90.86(5)   | N11–Ru2–Cl2       | 91.09(5)   |
| N6–Ru1–Cl1        | 89.13(5)   | N16–Ru2–Cl2       | 89.34(5)   |

**Table S10.** UV-vis Absorption Bands [Wavelength and Molar Absorptivity (in Brackets)] for Complexes **B** and **C** in Methanol at 298K used for the establishment of equations (3) and (4). The metal-centered Ru<sup>III</sup>/Ru<sup>II</sup> redox potential increases with the increase of the absorption wavelengths  $\lambda$  (Fig. S7)

| Complex                  | $\lambda_{\text{max}}$ (nm) /<br>$\varepsilon$ (mM <sup>-1</sup> cm <sup>-1</sup> ) | Complex   | $\lambda_{\text{max}}$ (nm) /<br>$\varepsilon$ (mM <sup>-1</sup> cm <sup>-1</sup> ) |
|--------------------------|-------------------------------------------------------------------------------------|-----------|-------------------------------------------------------------------------------------|
| <b>B1</b>                | 347<br>(3.29)                                                                       | <b>C2</b> | 346<br>(2.71)                                                                       |
| <b>B3</b>                | 358<br>(3.12)                                                                       | <b>C3</b> | 363<br>(2.67)                                                                       |
| <b>B4</b>                | 371<br>(3.55)                                                                       | <b>C6</b> | 400<br>(2.77)                                                                       |
| <b>B5</b>                | 369<br>(3.08)                                                                       | <b>C7</b> | 401<br>(3.71) <sup>a</sup>                                                          |
| <b>B6·H<sub>2</sub>O</b> | 376<br>(3.35)                                                                       | <b>C8</b> | 452<br>(2.69)                                                                       |
| <b>B7</b>                | 376<br>(3.18)                                                                       |           |                                                                                     |
| <b>B8</b>                | 381<br>(3.71)                                                                       |           |                                                                                     |

<sup>a</sup> overlapped band



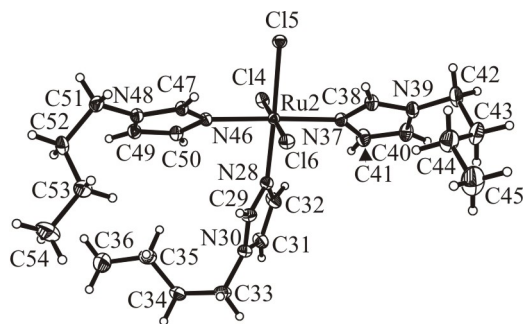

**Fig. S1.** ORTEP view of the second independent molecule of  $[\text{Ru}^{\text{III}}\text{Cl}_3(\text{buim})_3]$  (**B1b**), showing the atom-numbering scheme. Thermal displacement ellipsoids are drawn at the 50% probability level.

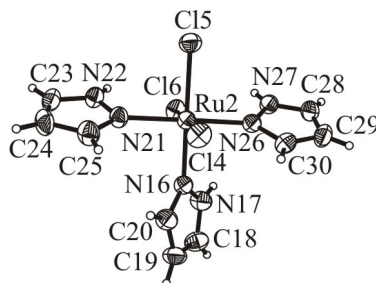

**Fig. S2.** ORTEP view of the second independent molecule of  $[\text{Ru}^{\text{III}}\text{Cl}_3(\text{Hpz})_3]$  (**B7b**), showing the atom-numbering scheme. Thermal displacement ellipsoids are drawn at the 50% probability level.

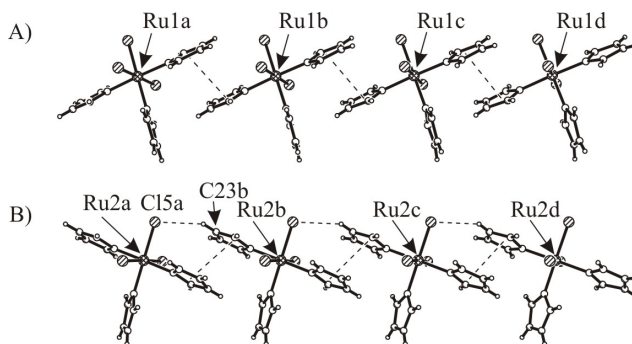

**Fig. S3.** Infinite chains in **B7** formed by the two independent molecules **B7a** (A) and **B7b** (B), which are stabilized by stacking  $\pi$ - $\pi$  interactions between *trans*-coordinated pyrazole ligands of adjacent molecules and *intermolecular* hydrogen bonding.

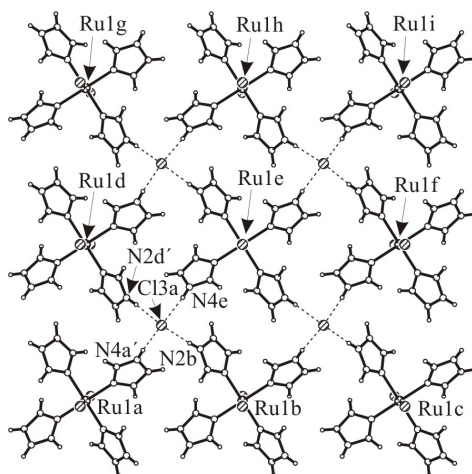

**Fig. S4.** N–H...Cl hydrogen bonding interactions of  $[\text{Ru}^{\text{III}}\text{Cl}_2(\text{Him})_4]\text{Cl}$  (**C2**) parallel to ac cell planes.

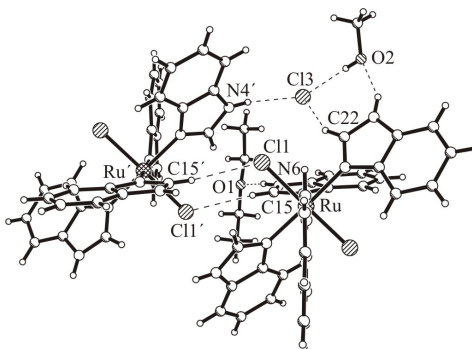

**Fig. S5.** A part of the crystal structure of **C3**·CH<sub>3</sub>OH·(C<sub>2</sub>H<sub>5</sub>)<sub>2</sub>O showing the formation of multiple hydrogen bonds between the complex cations, counter anion and solvent molecules.

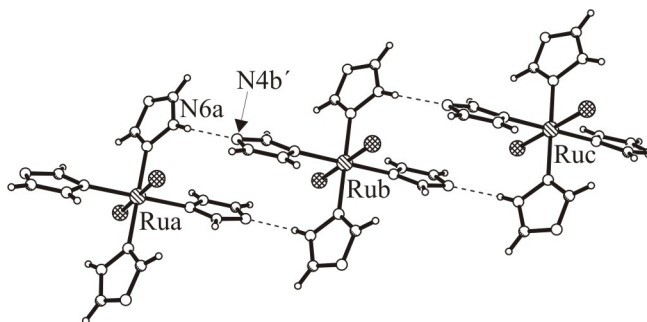

**Fig. S6.** Parallel chains in the structure of **C6a**·2H<sub>2</sub>O, which are stabilized by strong *intrachain* hydrogen bonding interactions between  $[\text{Ru}^{\text{III}}\text{Cl}_2(\text{Htrz})_4]^+$ .

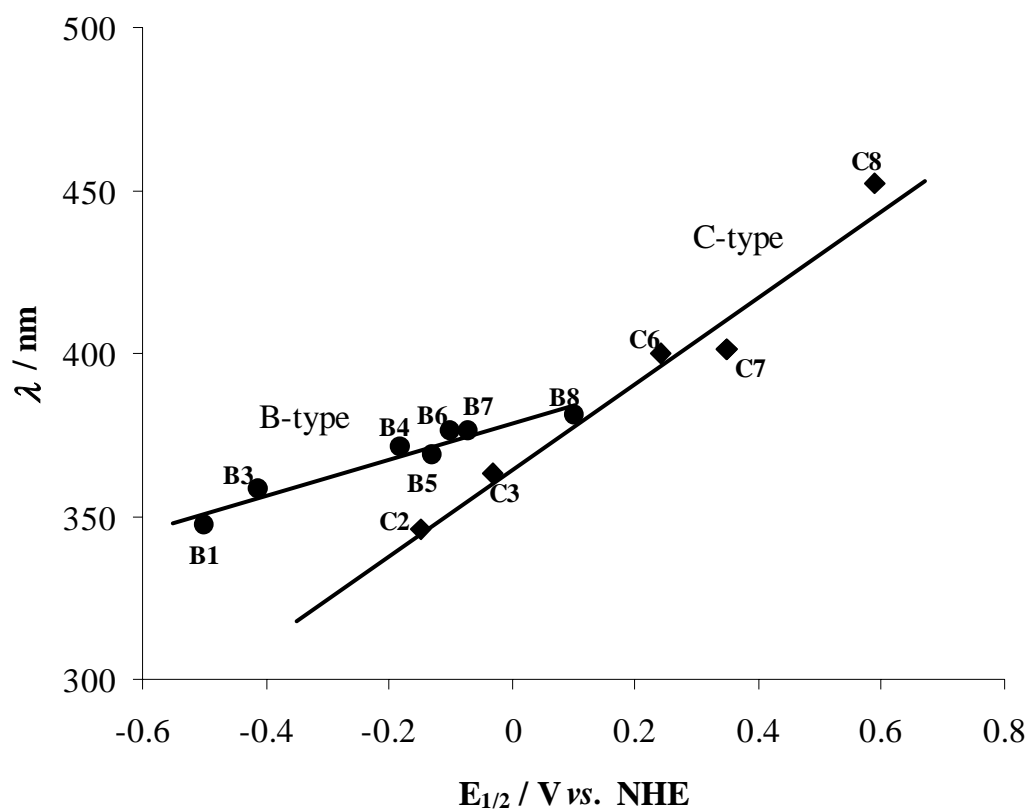

**Fig. S7.** Plot of the UV-vis absorption bands against  $E_{1/2}$  ( $\text{Ru}^{\text{III}}/\text{Ru}^{\text{II}}$ ) for complexes **B** (●) and **C** (◆). The electrochemical data is shown in Table 3 and the optical data in Table S10:  $\lambda$  (nm) = 55.9  $E_{1/2}$  (V) + 378.6 ( $r = 0.97$ ) (**B**) and  $\lambda$  (nm) = 136.1  $E_{1/2}$  (V) + 365.2 ( $r = 0.99$ ) (**C**).

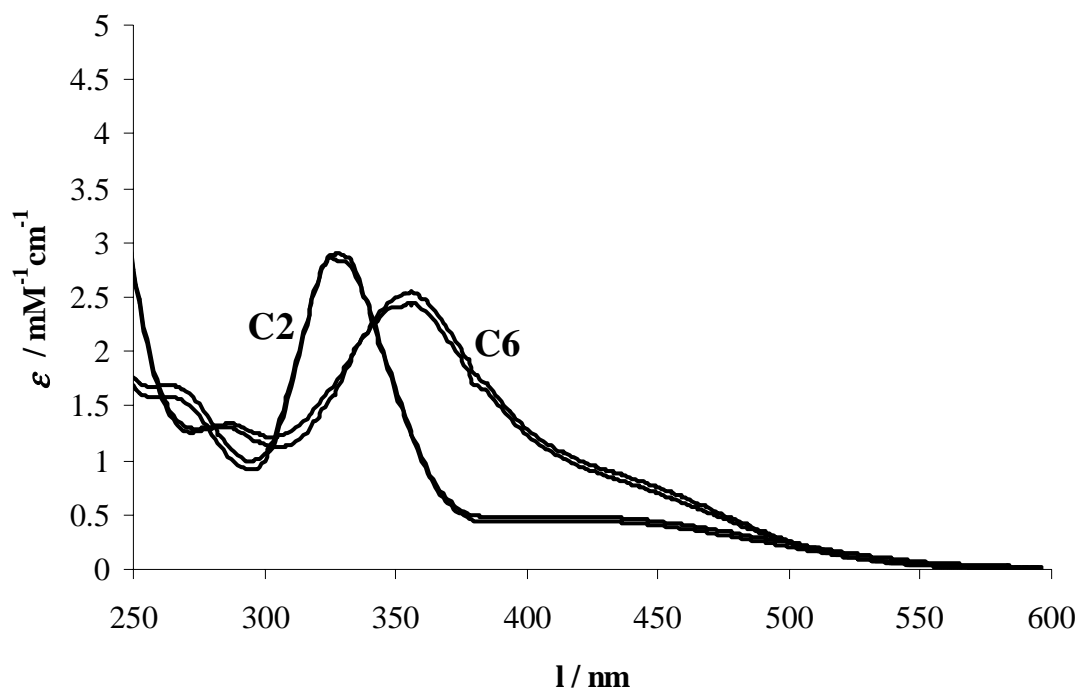

**Fig. S8.** The electronic absorption spectra of **C2** [measured directly after dissolution (upper line) and after 24 h (lower line)] and **C6** [measured directly after dissolution (upper line) and after 3 h (lower line)] in 0.2 M phosphate buffer at pH 7.0 at room temperature.
